# Supplementary material
Source: publisher figshare collection journal article supplement (https://acs.figshare.com/ndownloader/files/16437029)
Supplement: Supplementary file 1 [file 16437029]

## Supporting Information

# Flower-like Mn-doped Magnetic Nanoparticles Functionalized with $\alpha_v\beta_3$ -Integrin-Ligand to Efficiently Induce Intracellular Heat after Alternating Magnetic Field Exposition, Triggering Glioma Cell Death.

*S. Del Sol-Fernández<sup>1, #</sup>, Y. Portilla-Tundidor<sup>2, #</sup>, L. Gutiérrez<sup>3</sup>, O.F. Odio<sup>1</sup>, E.*

*Reguera<sup>1, \*</sup>, D.F. Barber<sup>2, \*</sup>, M.P. Morales<sup>4, \*</sup>.*

*<sup>1</sup>Instituto Politécnico Nacional, Centro de Investigación en Ciencia Aplicada y Tecnología Avanzada, Unidad Legaria (CICATA-Legaria), Calz Legaria 694, Col. Irrigación, 11500 Ciudad de México, México.*

*<sup>2</sup>Department of Immunology and Oncology and Nanobiomedicine Initiative, Centro Nacional de Biotecnología, (CNB-CSIC), Darwin 3, 28049 Madrid, Spain*

*<sup>3</sup>Departamento de Química Analítica, Universidad de Zaragoza, Instituto de Nanociencia de Aragón, Instituto de Ciencia de Materiales de Aragón (ICMA-CSIC) and CIBER-BBN, 50009 Zaragoza, Spain.*

*<sup>4</sup>Department of Energy, Environment and Health, Instituto de Ciencia de Materiales de Madrid (ICMM-CSIC), Sor Juana Ines de la Cruz 3, 28049 Madrid, Spain.*

### AUTHOR INFORMATION

Co-senior authors and corresponding authors

\*E-mail: [puerto@icmm.csic.es](mailto:puerto@icmm.csic.es) (M.P.M)

\*E-mail: [dfbarber@cnb.csic.es](mailto:dfbarber@cnb.csic.es) (D.F.B)

\*E-mail: [edilso.reguera@gmail.com](mailto:edilso.reguera@gmail.com) (E.R)



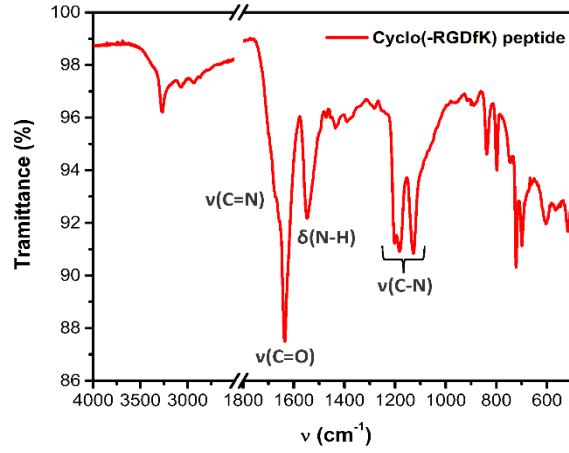

**Figure S1.** ATR spectra of Cyclo(-RGDfK) peptide.

## S2. Estimation of the number of cRGD peptide molecules on NF-DMSA nanoparticles surface.

To estimate the amount of peptide molecules per nanoparticle, we consider the particle as a sphere to simplify the calculations, so its volume is given by:

$$V = \frac{4}{3} \pi r^3$$

where, the diameter from TEM is  $D = 18.3 \text{ nm}$ , so the volume of each nanoparticle is:

$$V = 3591 \times 10^{-21} \text{ cm}^3.$$

The nanoparticle volume in one gram is obtained as follows:

$$V_{Fe_3O_4} = \frac{m}{\rho_{Fe_3O_4}} = \frac{1 \text{ gr}}{5.1 \frac{\text{gr}}{\text{cm}^3}} = 0.196 \text{ cm}^3,$$

so, the total number of nanoparticles in one gram is:

$$N^{\circ} \text{ of NPs per gram} = \frac{V_{Fe_3O_4}}{V} = 5.46 \times 10^{22}.$$

From the Micro BCA Protein Assay Reagent Kit analysis, we know that  $1 \frac{\text{mg NPs}}{\text{mL}}$  is equivalent to  $1.47 \frac{\mu\text{g Peptide}}{\mu\text{L}}$ . To know the number of peptide molecules in  $1.47 \frac{\mu\text{g Peptide}}{\mu\text{L}}$ , we divide by the molecular weight of it and multiply it by Avogadro's number  $N_A = 6.022 \times 10^{23} \text{ mol}^{-1}$ , so:

$$N^{\circ} \text{ of peptide molecules per gram} = \frac{1.47 \times 10^{-3} \text{ g}}{603.7 \frac{\text{g}}{\text{mol}}} \times N_A = 1.47 \times 10^{18}$$

Therefore, to know the number of peptide molecules per nanoparticle:

$$N^{\circ} \text{ of peptide molecules per particle} = \frac{5.46 \times 10^{22}}{(1.47 \times 10^{15})(10^3)} = \mathbf{37.19}$$

(The factor  $10^3$  in the denominator is due to the equivalence mentioned above)

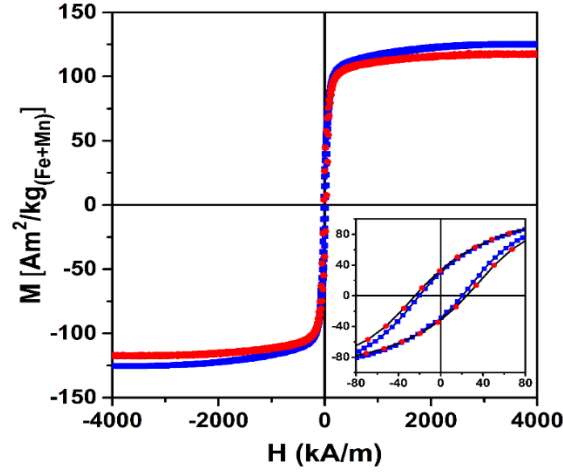

**Figure S2.** Hysteresis loops recorded at 5 K for NF-DMSA (blue) and NF-DMSA-PEP (red) nanoparticles. Inset: low field hysteresis loops for both nanoparticles.

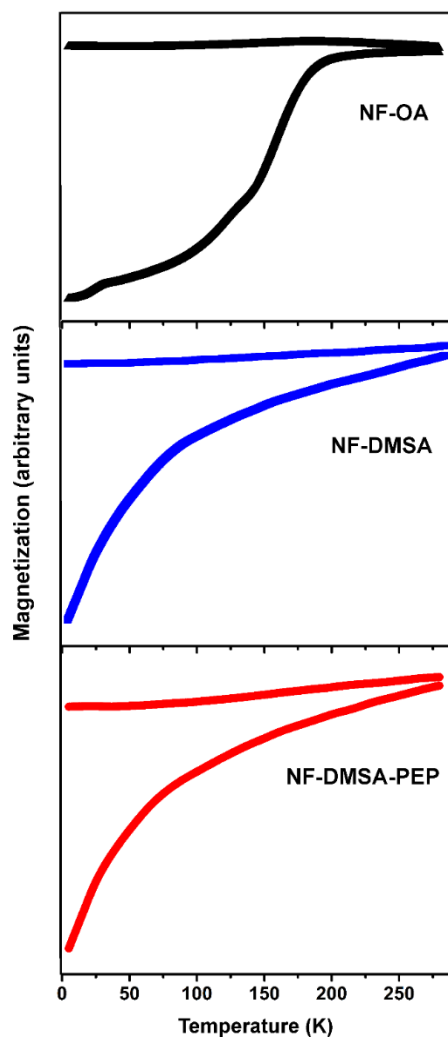

**Figure S3.** ZFC-FC of NF-OA, NF-DMSA and NF-DMSA-PEP nanoparticles under 100 Oe field.

**Table S1.** Magnetic properties of NF-DMSA and NF-DMSA-PEP nanoparticles at 5 and 300 K.

| Samples            | M <sub>s</sub><br>(Am <sup>2</sup> /kg(Fe+Mn)) |       | M <sub>r</sub><br>(Am <sup>2</sup> /kg(Fe+Mn)) |       | H <sub>c</sub><br>(kA/m) |       |
|--------------------|------------------------------------------------|-------|------------------------------------------------|-------|--------------------------|-------|
|                    | 5 K                                            | 300 K | 5 K                                            | 300 K | 5 K                      | 300 K |
| <b>NF-DMSA</b>     | 125                                            | 99    | 29.4                                           | 2.7   | 20.4                     | 1.25  |
| <b>NF-DMSA-PEP</b> | 117                                            | 97    | 30.5                                           | 5.2   | 24.4                     | 2.42  |

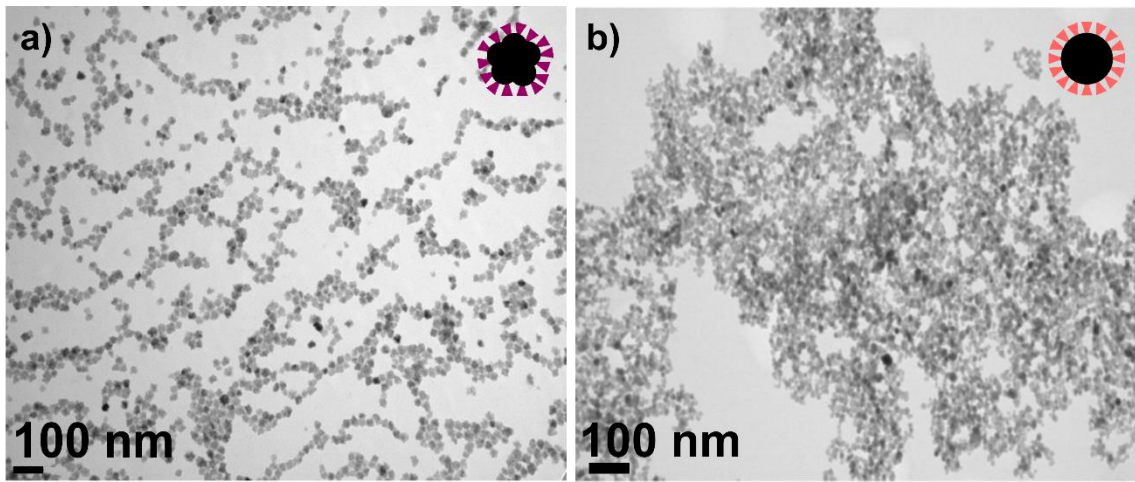

**Figure S4.** Transmission electron microscope (TEM) images of nanoparticles used as reference samples. (a) 20.8±0.1 nm Flower-like Fe<sub>3</sub>O<sub>4</sub> nanoparticle coated with citric acid (NF-REF) and (b) 12.2±2.3 nm spherical Fe<sub>3</sub>O<sub>4</sub> nanoparticle coated with dimercaptosuccinic acid (NP-REF). Inset: Carton images corresponding to NF-REF and NP-REF, respectively.

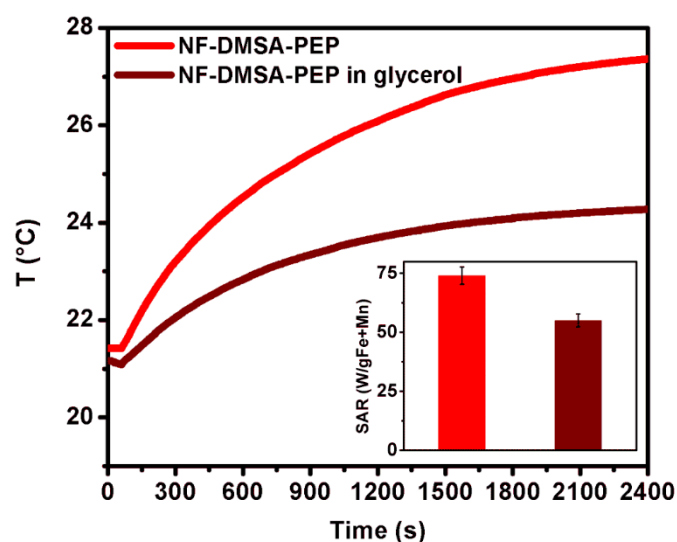

**Figure S5.** Heating curves of NF-DMSA-PEP in water and NF-DMSA-PEP in a water/glycerol mixture (50/50, v/v) under the experimental condition of ( $f = 96$  kHz,  $H = 47$  kA/m), ( $V_F = 1$  ml for NF-DMSA-PEP in water and  $V_F = 500 \mu\text{l}$  NF-DMSA-PEP in a water/glycerol mixture) for 40 minutes. The content of the magnetic ions for the sample was ( $[\text{Fe} + \text{Mn}] = 0.45$  mg/mL). Inset: SAR values of both samples. The SAR values were calculated using the first 30 s of the initial slopes.

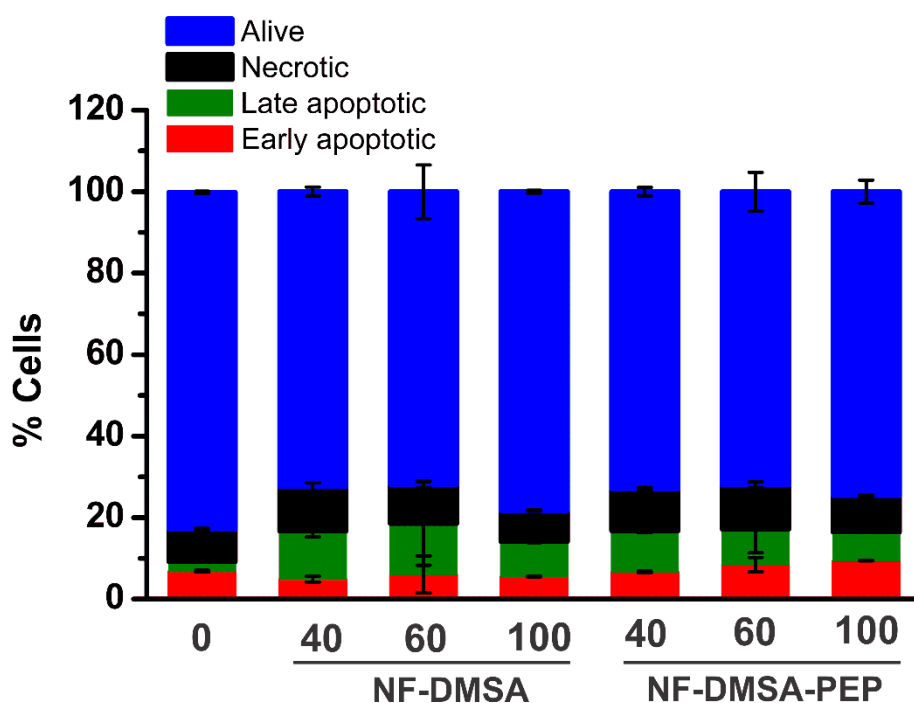

**Figure S6.** Annexin-V/PI analysis by flow cytometry of U87MG cells after incubation with NF-DMSA or NF-DMSA-PEP at 24 h. Concentration was varied between 0 -100  $\mu\text{g}$  Fe/mL concentration of NPs. Data (mean  $\pm$ SD) are representative of three independent

experiments. Cell survival was analyzed for FITC-annexin V/propidium iodide staining (Ex/Em = 495/519 nm). The samples were analyzed by flow cytometry, with the FC500 flow cytometer (Beckman Coulter).

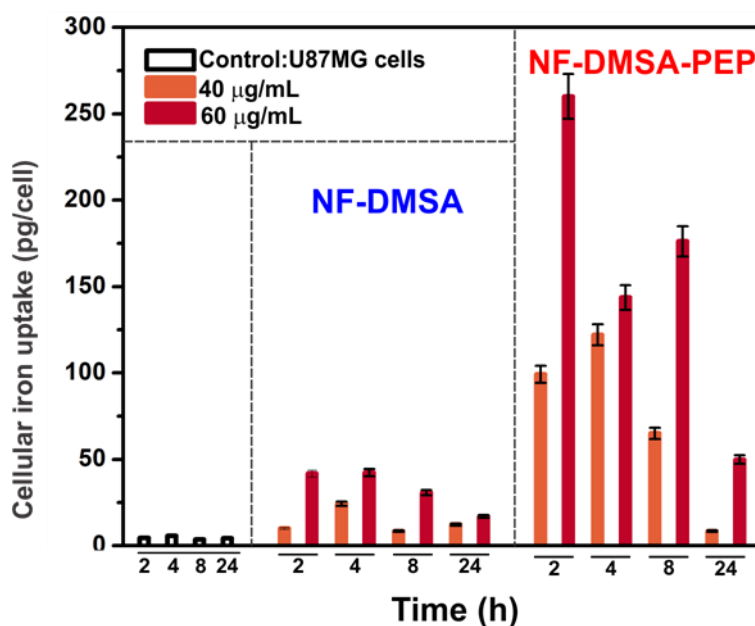

**Figure S7.** Uptake kinetics for NF-DMSA and NF-DMSA-PEP nanoparticles at (0, 40 and 60 µg Fe/mL concentration of NPs in U87MG cells determined by ICP-OES. Data (mean  $\pm$ SD) are representative of three independent experiments.

**Iron Quantification in supernatants by ICP-OES.** The cells have been seeded into a 6-well plate with a density of  $2 \times 10^4$  cells per well (24h, 37°C) in Dulbecco's modified Eagle's medium (DMEM). Then, NF-DMSA-PEP sample at concentration of 60 µg/mL has been added into the plate at different time intervals (0, 2, and 4 h). After incubation, the supernatants have been removed (named in the Figure S8 as SN1), and the cells have been harvested with fresh DMEM. After that, the cells loaded NF-DMSA-PEP have been exposed to an AMF of 96 kHz and 47 kA/m for 1 h. Immediately, after MHT, the new supernatants have been collected and reserved in an Eppendorf tube. The samples (25 µL) have been digested in aqua regia at 60°C overnight and diluted up a volume of 25 mL with deionized water. The amount of iron in each supernatant has been measured by ICP-OES (Perkin Elmer-2400).



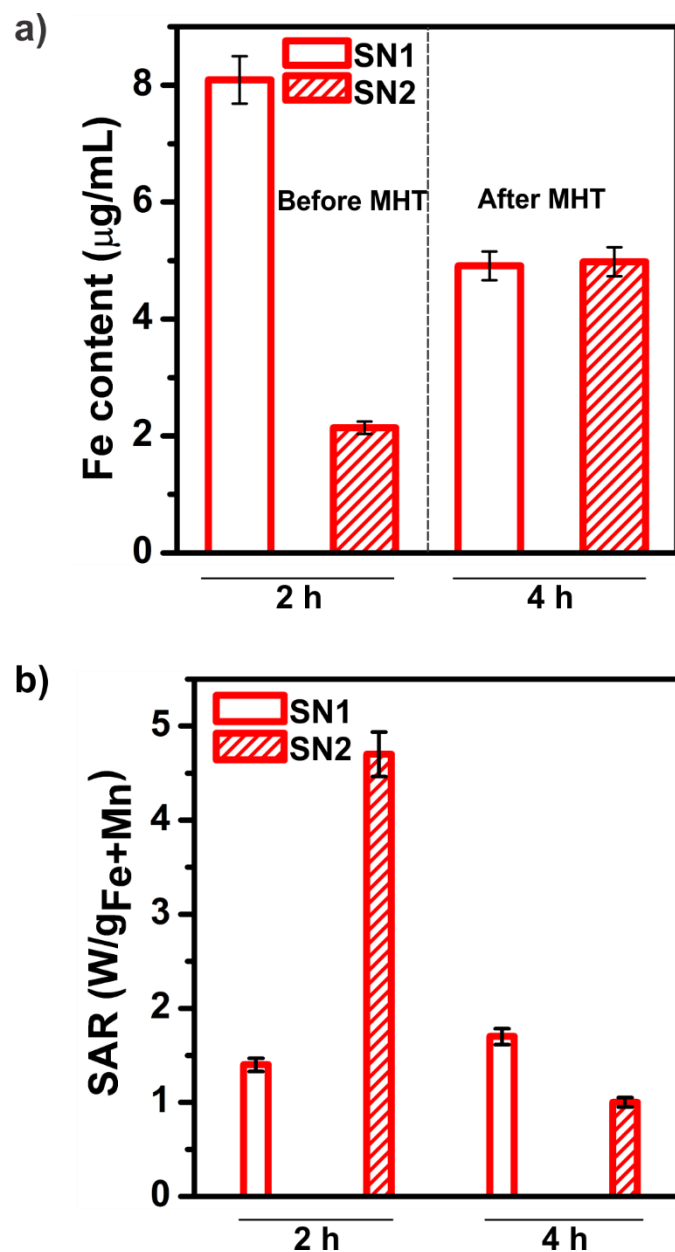

**Figure S8.** (a) Quantification of iron concentration in 1mL of the supernatant before (SN1) and after (SN2) MHT with NF-DMSA-PEP loaded U87MG cells at 2 and 4 h by ICP-OES. Data are shown as mean  $\pm$  SD ( $n = 3$ ) and (b) SAR values of SN1 and SN2 under the same experimental condition ( $f = 96$  kHz,  $H = 47$  kA/m) at 2 h and 4 h. The heating behavior of each supernatant to determine de SAR values have been performed in an Eppendorf tube, after 20 min of ultrasound sonication of the samples.
